# Supplementary material for: Utilizing a nanocomposite aerogel grafted with Fe3O4@GO for the extraction and determination of metoprolol in exhaled breath condensate
Source: Royal Society of Chemistry journal article supplement (doi:10.1039/d3ra03883a), 2023-01-01
Supplement: d3ra03883a1.pdf [file d3ra03883a1.pdf]

## Electronic supplementary file

### Utilizing a nanocomposite aerogel grafted with Fe<sub>3</sub>O<sub>4</sub>@GO for extraction and determination of metoprolol in exhaled breath condensate

**Bitā Azad**<sup>1,2</sup>, **Zahra Karimzadeh**<sup>1,2</sup>, **Amirreza Jabbaripour**<sup>3</sup>, **Vahid Jouyban-Gharamaleki**<sup>4</sup>, **Maryam Khoubnasabjafari**<sup>5,6</sup>, **Abolghasem Jouyban**<sup>1,7</sup>, **Elaheh Rahimpour**<sup>1,8\*</sup>

<sup>1</sup> *Pharmaceutical Analysis Research Center and Faculty of Pharmacy, Tabriz University of Medical Sciences, Tabriz, Iran*

<sup>2</sup> *Student Research Committee, Faculty of Pharmacy, Tabriz University of Medical Sciences, Tabriz, Iran*

<sup>3</sup> *Faculty of Medicine, Tabriz Azad Islamic University, Tabriz, Iran*

<sup>4</sup> *Kimia Idea Pardaz Azarbayjan (KIPA) Science Based Company, Tabriz University of Medical Sciences, 5165665811, Tabriz, Iran*

<sup>5</sup> *Tuberculosis and Lung Diseases Research Center, Tabriz University of Medical Science, Tabriz, Iran*

<sup>6</sup> *Department of Anesthesiology and Intensive Care, Faculty of Medicine, Tabriz University of Medical Sciences, Tabriz, Iran*

<sup>7</sup> *Pharmaceutical Sciences Research Center, Shahid Beheshti University of Medical Sciences, Tehran, Iran*

<sup>8</sup> *Infectious and Tropical Diseases Research Center, Tabriz University of Medical Sciences, Tabriz, Iran*

\* Corresponding author: (E. Rahimpour), *E-mail address*: Rahimpour\_e@yahoo.com

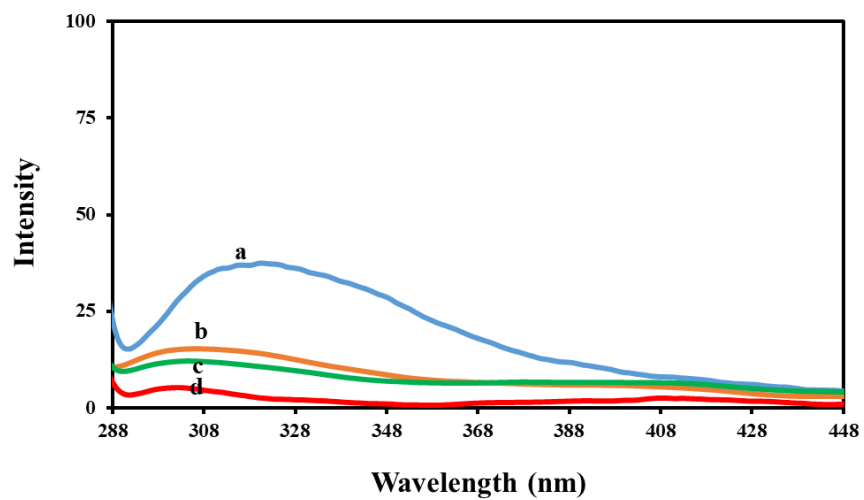

**Fig. 1S.** Fluorescence spectrum for (a) blank EBC of a healthy subject spiked with  $0.1 \mu\text{g.mL}^{-1}$  MET, (b) and (c) negative control samples, *i.e.*, patient who is not administered MET (administrated drugs for sample “b” are sertraline and clonazepam and for sample “c” are depakine, inderal and clonazepam) (d) blank EBC of a healthy subject without any MET spike
